# Supplementary material for: Global Transcriptional Profiles of the Copper Responses in the Cyanobacterium Synechocystis sp. PCC 6803
Source: PLoS One. 2014 Sep 30;9(9):e108912. doi: 10.1371/journal.pone.0108912 (PMC4182526; doi:10.1371/journal.pone.0108912)
Supplement: Table S4 — GSEA analysis for high copper treatment. (XLSX) [file pone.0108912.s012.xlsx]

## Sheet: Hoja1
Table S4. High Copper GSEA analysis. Gene sets and functional categories were taken from the Cyanobase, KEEG pathways and our home made hand accurate. Only results for those categories which were significantly affected (NOM p-val < 0.05 and FDR q-val < 0.2) are shown. FDR: False discovery rate.
High Copper Treatment
Gene Set annotation Cyanobase
Down regulated
NAME	SIZE	ES	NES	NOM p-val	FDR q-val	FWER p-val
PHOTOSYNTHESIS AND RESPIRATION	142	0.558251	2.61144	0	0	0
H8-PHYCOBILISOME	18	0.834647	2.49162	0	0	0
H1-ATP SYNTHASE	10	0.89041	2.24463	0	8.05e-05	0.0002
H6-PHOTOSYSTEM I	16	0.761608	2.21176	0	6.04e-05	0.0002
H7-PHOTOSYSTEM II	28	0.650895	2.17904	0	4.83e-05	0.0002
C1-MEMBRANES, LIPOPROTEINS, AND PORINS	12	0.655211	1.72374	0.00868894	0.0448291	0.196
CELL ENVELOPE	67	0.409683	1.68085	0.00189514	0.058172	0.2798
E6-POLYSACCHARIDES AND GLYCOPROTEINS	20	0.543067	1.67513	0.012253	0.0538885	0.2919
F11-PYRUVATE DEHYDROGENASE	5	0.822402	1.65795	0.00840829	0.0558043	0.3339
L2-RNA SYNTHESIS, MODIFICATION, AND DNA TRANSCRIPTION	23	0.487261	1.55074	0.0313234	0.122193	0.6344
ENERGY METABOLISM	93	0.339088	1.47926	0.0129478	0.157695	0.8172
TRANSCRIPTION	30	0.421357	1.44411	0.0487078	0.183488	0.8789
Up regulated
NAME	SIZE	ES	NES	NOM p-val	FDR q-val	FWER p-val
D3-CHAPERONES	16	-0.742818	-2.11624	0	0.00117772	0.0015
O8-TRANSPOSON-RELATED FUNCTIONS	71	-0.482463	-1.93028	0.000191	0.0141209	0.0362
O3-DRUG AND ANALOG SENSITIVITY	23	-0.569955	-1.78819	0.00567836	0.0418367	0.1541
M2-DEGRADATION OF PROTEINS, PEPTIDES, AND GLYCOPEPTIDES	26	-0.543197	-1.75783	0.00554126	0.0425597	0.2017
B10-THIOREDOXIN, GLUTAREDOXIN, AND GLUTATHIONE	18	-0.538761	-1.59209	0.0284137	0.140763	0.6134
CELLULAR PROCESSES	77	-0.378972	-1.54534	0.0110666	0.162927	0.7301
GO slim
Down regulated
NAME	SIZE	ES	NES	NOM p-val	FDR q-val	FWER p-val
PHOTOSYNTHESIS (GO:0015979)	51	0.713372	2.75329	0	0	0
PHYCOBILISOME (GO:0030089)	15	0.842024	2.41354	0	0	0
PROTON-TRANSPORTING TWO-SECTOR ATPASE COMPLEX (GO:0016469)	9	0.878095	2.13865	0	0.000627	0.0015
THYLAKOID LIGHT-HARVESTING COMPLEX (GO:0009503)	8	0.875364	2.04884	0	0.00205434	0.0065
ATP SYNTHESIS COUPLED PROTON TRANSPORT (GO:0015986)	8	0.861835	2.0215	0.000193	0.00268787	0.0105
HYDROGEN ION TRANSPORTING ATPASE ACTIVITY, ROTATIONAL MECHANISM (GO0046961)"	7	0.857917	1.92576	0.000788	0.0109645	0.0509
HYDROGEN ION TRANSPORTING ATP SYNTHASE ACTIVITY, ROTATIONAL MECHANISM (GO0046933)"	7	0.857917	1.92361	0	0.0096208	0.0521
PHOTOSYSTEM I (GO:0009522)	7	0.837533	1.89204	0.00134901	0.0132988	0.0799
PHOTOSYSTEM II REACTION CENTER (GO:0009539)	8	0.809489	1.88478	0.000584	0.0130804	0.0879
ELECTRON TRANSPORT (GO:0006118)	138	0.405213	1.87682	0	0.0130249	0.0971
SOLUTE:HYDROGEN ANTIPORTER ACTIVITY (GO	6	0.8626	1.83641	0.000964	0.0204338	0.1623
REGULATION OF PH (GO:0006885)	6	0.8626	1.82379	0.000779	0.0220808	0.1894
TRANSPORTER ACTIVITY (GO:0005215)	88	0.413566	1.77913	0.00063	0.0360168	0.3087
PHOTOSYSTEM I REACTION CENTER (GO:0009538)	5	0.865594	1.74575	0.0034496	0.049264	0.4236
PHOTOSYNTHESIS, LIGHT REACTION (GO0019684)"	11	0.665296	1.73596	0.00674202	0.0510903	0.4548
CALCIUM ION BINDING (GO:0005509)	12	0.633505	1.68847	0.0143053	0.0798344	0.6353
GLYCOLYSIS (GO:0006096)	13	0.605836	1.66073	0.0199574	0.0981739	0.7305
OUTER MEMBRANE-BOUNDED PERIPLASMIC SPACE (GO:0030288)	20	0.527238	1.62719	0.022609	0.126248	0.8338
REGULATION OF TRANSCRIPTION (GO:0045449)	29	0.465337	1.58822	0.01893	0.167641	0.915
TRANSPORT (GO:0006810)	128	0.341856	1.5756	0.0021978	0.177703	0.9367
INORGANIC PHOSPHATE TRANSMEMBRANE TRANSPORTER ACTIVITY (GO:0005315)	9	0.633914	1.5532	0.040141	0.202684	0.9636
THYLAKOID (GO:0009579)	5	0.765373	1.5403	0.0300363	0.21396	0.9768
PHOSPHATE TRANSPORT (GO:0006817)	9	0.633914	1.53909	0.0405775	0.206399	0.9778
Up regulated
NAME	SIZE	ES	NES	NOM p-val	FDR q-val	FWER p-val
TRANSPOSITION, DNA-MEDIATED (GO0006313)"	27	-0.755899	-2.47592	0	0	0
TRANSPOSASE ACTIVITY (GO:0004803)	24	-0.669567	-2.13248	0.0002	0.00117223	0.0033
PROTEIN BINDING (GO:0005515)	27	-0.644273	-2.0962	0.000396	0.00132875	0.0056
PROTEIN FOLDING (GO:0006457)	18	-0.62645	-1.84924	0.00363123	0.045113	0.2235
UNFOLDED PROTEIN BINDING (GO:0051082)	10	-0.731193	-1.82905	0.00469292	0.0460034	0.2762
METAL ION TRANSMEMBRANE TRANSPORTER ACTIVITY (GO:0046873)	6	-0.816795	-1.76116	0.00667223	0.0844721	0.5086
METAL ION TRANSPORT (GO:0030001)	7	-0.772894	-1.74993	0.0107987	0.0813708	0.5521
IRON-SULFUR CLUSTER ASSEMBLY (GO:0016226)	5	-0.812596	-1.65722	0.0152169	0.173094	0.8622
Hand accurate
Down regulated
NAME	SIZE	ES	NES	NOM p-val	FDR q-val	FWER p-val
REPRESSED_2_CD_300MIN	270	0.623303	3.17586	0	0	0
REPRESSED_2_CD_180MIN	282	0.618193	3.16035	0	0	0
REPRESSED_2_CD_360MIN	275	0.619063	3.13662	0	0	0
REPRESSED_2_CD_90MIN	196	0.635897	3.09565	0	0	0
REPRESSED_2_4H_NITROGEN_STARVATION	214	0.566473	2.79952	0	0	0
REPRESSED_KEGG_HIHARA_HL_15MIN	157	0.577702	2.73326	0	0	0
HL_15MIN_REPRESSED	458	0.504454	2.70132	0	0	0
REPRESSED_SULFUR_DEPRIVATION	147	0.551644	2.59358	0	0	0
REPRESSED_GSE4613_UV_3H	87	0.602591	2.59095	0	0	0
REPRESSED_KEGG_HIHARA_HL_1H	89	0.592458	2.56198	0	0	0
REPRESSED_GSE4613_UV_36H	96	0.558312	2.45081	0	0	0
REPRESSED_2_SLL0822(ABRB)	29	0.717423	2.44111	0	0	0
REPRESSED_KEGG_HIHARA_DBMIB20	425	0.456402	2.42876	0	0	0
RRF2_DOWN	8	0.984874	2.31716	0	0	0
REPRESSED_SINGH_TEMP	352	0.441832	2.31245	0	0	0
SINGH_H2O2_REPRESSED_	324	0.440235	2.28336	0	0	0
REPRESSED_SINGH_H2O2	324	0.440235	2.28222	0	0	0
STATIONARY_SINGH_INDUCED_	380	0.429154	2.26766	0	0	0
INDUCED_STATIONARY_SINGH	380	0.429154	2.25774	0	0	0
REPRESSED_SINGH_LINVSSAT	374	0.424173	2.22984	0	5.19e-06	0.0001
INDUCED_GSE3703_H2O2_CHAUVAT	291	0.42581	2.18291	0	9.79e-06	0.0002
REPRESSED_WT_DFB_IRON_DEPRIVATION	124	0.475111	2.1637	0	1.4e-05	0.0003
HIHARAY&IKEUCHI_GROUP IV_REPRESSED_DCMU_DBMIB	41	0.564192	2.07155	0.000204	9.04e-05	0.0019
REPRESSED_KEGG_HIHARA_HL_6H	119	0.446572	2.02784	0	0.000166	0.0036
REPRESSED_SUZUKI_COLD_STRESS_WT	151	0.4223	1.98142	0	0.000307	0.0069
REPRESSED_V	486	0.365877	1.97195	0	0.000358	0.0084
REPRESSED_KEGG_KOBAYASHI_OXIDATIVE STRESS -SLR1738	39	0.511598	1.86685	0.00100381	0.00122865	0.0297
NTCA_REGULON	23	0.567685	1.81109	0.00409038	0.00240462	0.0602
REPRESSED_KOBAYASHI_OXIDATIVE STRESS _SLR1738	39	0.487798	1.784	0.00260782	0.0032295	0.0826
P_STARVATION_INDUCED_7	12	0.661745	1.75815	0.00555556	0.00417101	0.1083
REPRESSED_KOBAYASHI_OXIDATIVE STRESS_MV	21	0.558731	1.7564	0.00750395	0.00410933	0.1103
SALT_HIK33_DEPENDENT	5	0.868707	1.75378	0.00154232	0.00405436	0.1123
SORBITOL_HIK33_DEPENDENT	11	0.671963	1.74514	0.00922111	0.00425158	0.1214
SORBITOL_RRE31_DEPENDENT	11	0.671963	1.73692	0.007109	0.00450544	0.132
INDUCED IN_REVERTANT_VSPSBOU	73	0.353556	1.46941	0.0200591	0.0424645	0.7457
LIMMA_H2O2_CHAUVAT	227	0.296193	1.46887	0.00182149	0.0414462	0.7474
REPRESSED_GSE1695_INORGANIC CARBON LIMITATION_1H	276	0.283012	1.44333	0.00257009	0.0479571	0.8031
REPRESSED_KEGG_HIHARA_HL_15H	100	0.324713	1.43227	0.0188841	0.0503848	0.8284
GENES WHOSE INDUCTION BYSALTSTRESS WAS REDUCED IN RRE31 CELLS (GROUP 1)	11	0.549283	1.42726	0.084789	0.0507174	0.8382
REPRESSED_KEGG_HIHARA_DCMU300	191	0.277634	1.34892	0.0193694	0.0823709	0.9525
LI_ET_AL_2004_H2O2	143	0.286055	1.33473	0.0320597	0.0880431	0.9654
INDUCED_GSE1695_INORGANIC CARBON LIMITATION_200MIN	296	0.258151	1.32313	0.013078	0.0924417	0.974
REPRESSE_OSANAI_NITROGEN	259	0.256694	1.29399	0.0234829	0.103486	0.9874
Up regulated
NAME	SIZE	ES	NES	NOM p-val	FDR q-val	FWER p-val
INDUCED_2 CD_90MIN	198	-0.698127	-3.31012	0	0	0
INDUCED_2 CD_300MIN	216	-0.671439	-3.21097	0	0	0
INDUCED_2 CD_180MIN	222	-0.655821	-3.15632	0	0	0
INDUCED_2 CD_360MIN	204	-0.636884	-3.0261	0	0	0
HL_15MIN_INDUCED	356	-0.554217	-2.80181	0	0	0
HIHARAY&IKEUCHI_GROUP_II_DCMU<DBMIB	42	-0.677565	-2.44523	0	0	0
HL_1H_INDUCED	441	-0.4585	-2.36655	0	1.46e-05	0.0001
FE_S_CLUSTER_BIO	12	-0.817343	-2.15302	0	9.51e-05	0.0008
OE_HIK34_REPRESSED_3	12	-0.791592	-2.09157	0.000407	0.000337	0.0033
HIK34_REGULON_BROAD	38	-0.573275	-2.03441	0.000397	0.000712	0.0076
SORBITOL_RRE1_DEPENDENT	23	-0.628517	-1.9648	0.00139248	0.00145737	0.017
RRE1_REGULON_BROAD	32	-0.568365	-1.9267	0.00118157	0.00208882	0.0266
INDUCED_6_WT44VS34	27	-0.590825	-1.92235	0.0010012	0.00205582	0.0284
SORBITOL_HIK34_DEPENDENT	19	-0.644447	-1.92047	0.00181014	0.00195249	0.0291
SALT_HIK34_DEPENDENT	28	-0.574813	-1.9053	0.00120676	0.00224111	0.0357
DELTAHIK34_REPRESSED_3	11	-0.741895	-1.90529	0.00387518	0.00210104	0.0357
INDUCED_KOBAYASHI_OXIDATIVE STRESS _SLR1738	56	-0.496185	-1.9046	0.000584	0.00198302	0.0358
RRF2_UP	31	-0.55551	-1.8774	0.00160192	0.00254619	0.0484
GENES WHOSE INDUCTION BYSALTSTRESS WAS REDUCED IN ?RRE1 CELLS (GROUP 2)	25	-0.537215	-1.73806	0.00919448	0.00954456	0.1795
INDUCED_KEGG_SHOUMSKAYA_WT_SALT_STRESS	450	-0.311822	-1.61522	0	0.0269178	0.4456
REPRESSED_GSE3703_H2O2_CHAUVAT	289	-0.323934	-1.60936	0.000174	0.026819	0.4596
PERR_REGULON	12	-0.604185	-1.5933	0.0440967	0.0290811	0.5024
INDUCED_KEGG_HIHARA_DCMU20	466	-0.300952	-1.56778	0.000168	0.0333849	0.5682
REPRESSED_STATIONARY_SINGH	241	-0.32049	-1.56333	0.00106819	0.0330676	0.5801
STATIONARY_SINGH_REPRESSED_	241	-0.32049	-1.55805	0.000359	0.0328886	0.5945
SINGH_H2O2_INDUCED_	341	-0.307653	-1.557	0.000173	0.0318936	0.5972
PERR_DEPENDENT_H2O2	6	-0.720057	-1.55318	0.0484528	0.0315752	0.6077
INDUCED_SINGH_H2O2	341	-0.307653	-1.55198	0	0.0307507	0.6115
INDUCED_2_SLL0822(ABRB)	42	-0.407532	-1.47568	0.0396747	0.0496356	0.7967
INDUCED_SULFUR_DEPRIVATION	90	-0.332416	-1.40028	0.0354894	0.0707817	0.9259
INDUCED_SINGH_LOWFE_3	238	-0.284633	-1.38032	0.0116113	0.0777984	0.9488
INDUCED_KEGG_HIHARA_HL_6H	96	-0.32162	-1.37509	0.0414235	0.0781561	0.9538
INDUCED_KEGG_HIHARA_HL_15MIN	237	-0.281095	-1.35715	0.0156639	0.0849971	0.9686
